# Supplementary material for: Visfatin and Resveratrol Differentially Regulate the Expression of Thymidylate Synthase to Control the Sensitivity of Human Colorectal Cancer Cells to Capecitabine Cytotoxicity
Source: MDPI journal article supplement (doi:10.3390/life11121371), 2021-12-09
Supplement: s1 [file s1]

**Figure 1C**

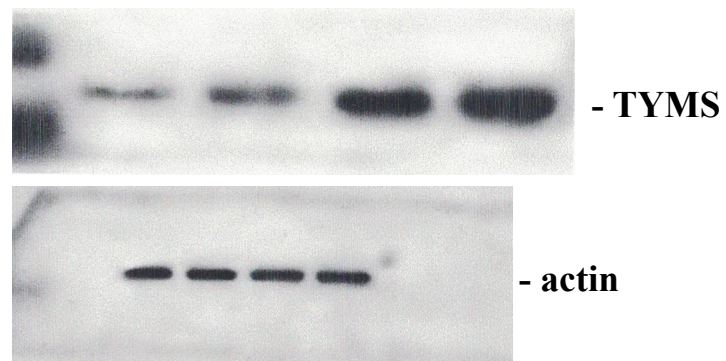

**Figure 3C**

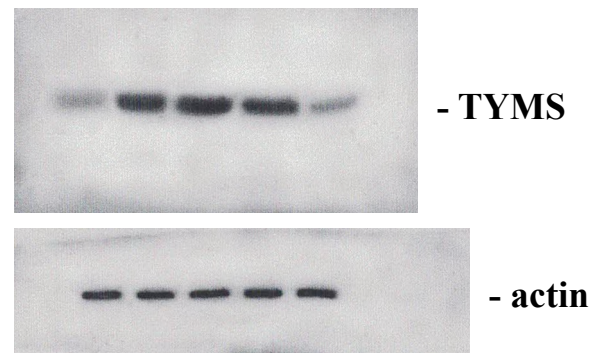

**Figure 4C**

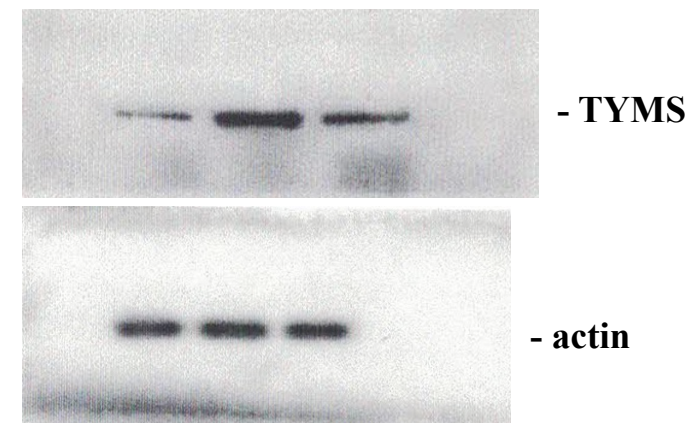

**Figure 1D**

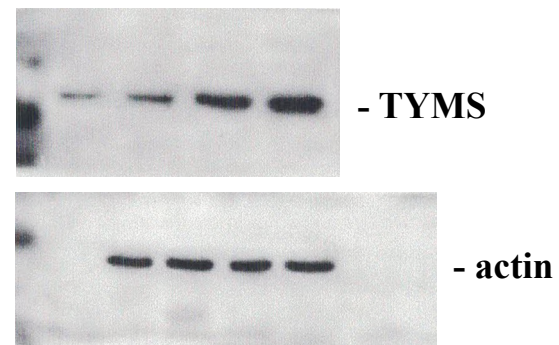

**Figure 3D**

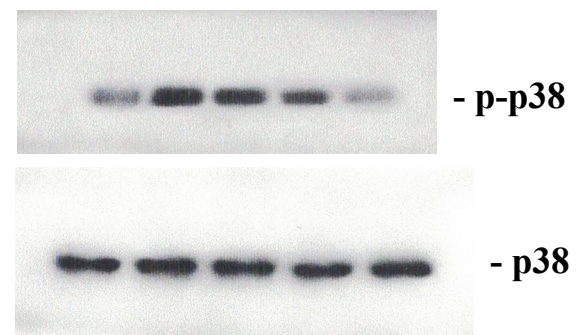

**Figure 6B**

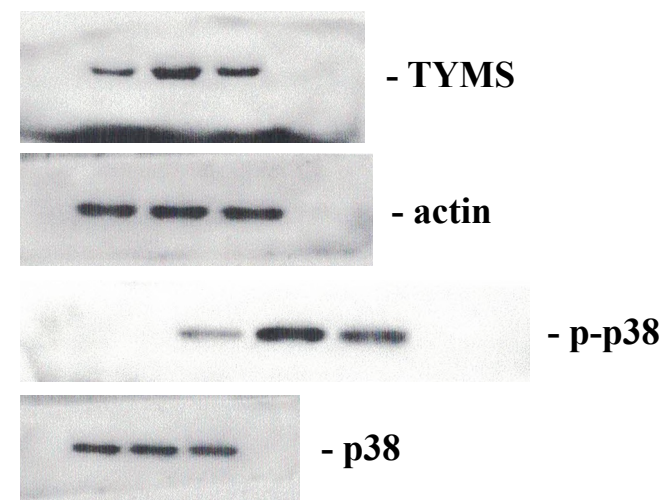

**Figure S1:** Gel images of Western blot in Figures 1, 3, 4, and 6.
